# Supplementary material for: Is the boundary layer of an ionic liquid equally lubricating at higher temperature?
Source: Royal Society of Chemistry journal article supplement (doi:10.1039/c5cp05837f), 2016-01-01
Supplement: c5cp05837f1.pdf [file c5cp05837f1.pdf]

## Supporting Information

# Is the boundary layer of an ionic liquid equally lubricating at higher temperature?

*Nicklas Hjalmarsson<sup>1</sup>, Rob Atkin<sup>2</sup>, Mark W. Rutland<sup>1,3\*</sup>*

<sup>1</sup>Surface and Corrosion Science, KTH Royal Institute of Technology, SE-10044 Stockholm,  
Sweden

<sup>2</sup>Discipline of Chemistry, The University of Newcastle, Callaghan, NSW 2308, Australia

<sup>3</sup>Chemistry, Materials and Surfaces, SP Technical Research Institute Sweden, SE-11428  
Stockholm, Sweden

\*[mark@kth.se](mailto:mark@kth.se)

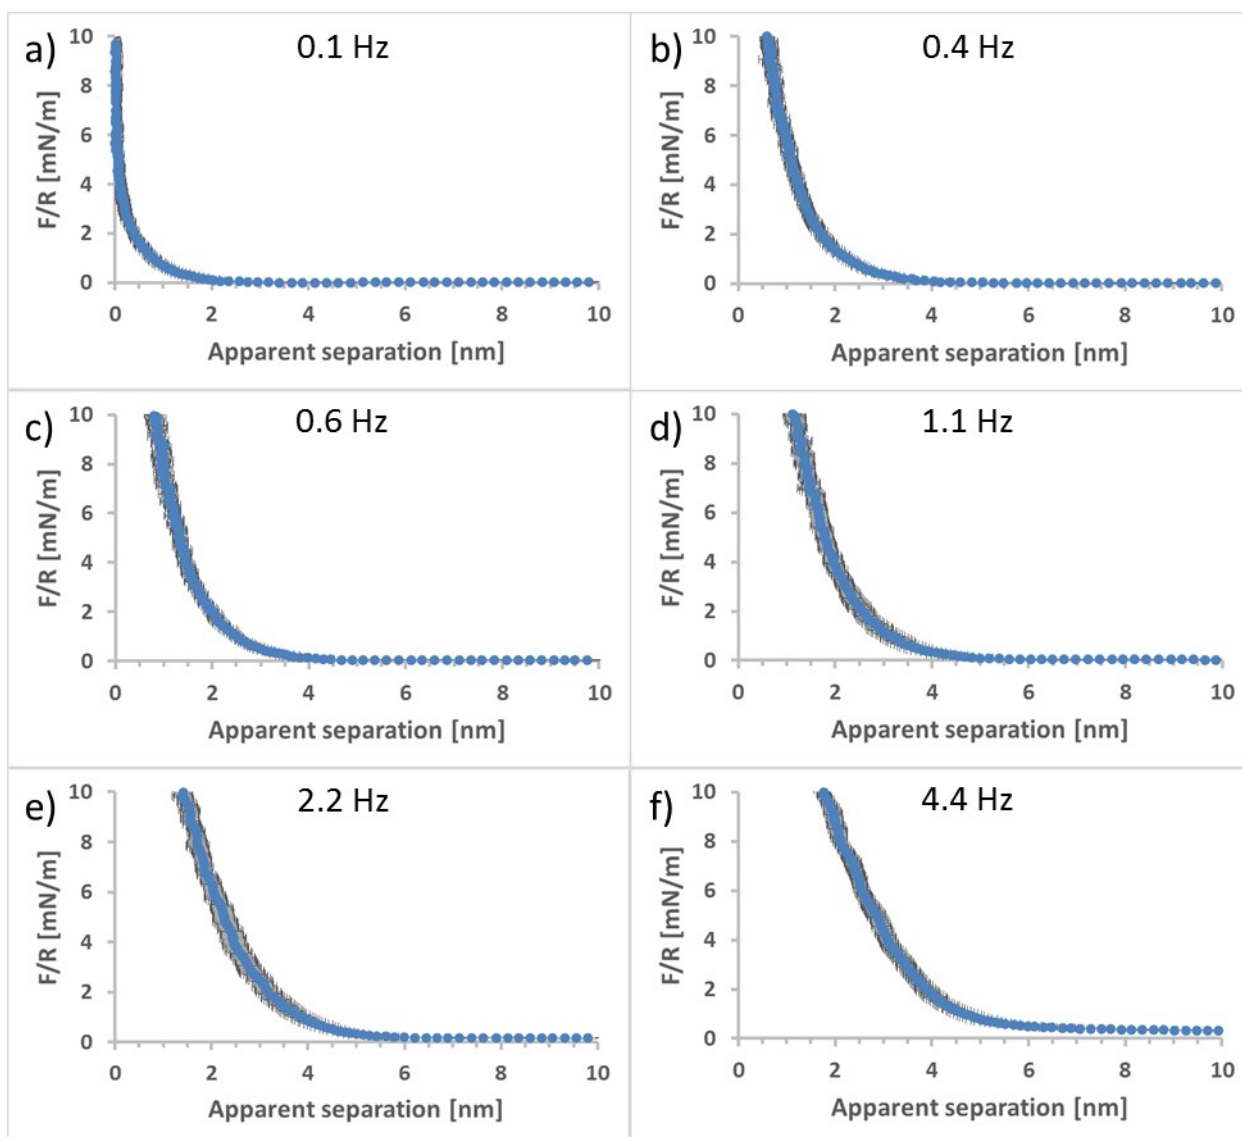

Figure S1. Averaged force profiles at room temperature in a mica-EAN-silica system for increasing approach rates: 0.1 (a), 0.4 (b), 0.6 (c), 1.1 (d), 2.2 (e), and 4.4 Hz (f). The experiment was performed using a colloidal probe (silica, radius  $3.4 \mu\text{m}$ ) glued to the free end of a tipless cantilever (spring constant  $0.92 \text{ N m}^{-1}$ ).

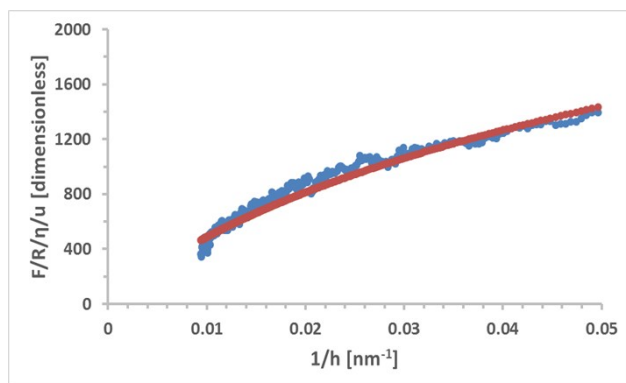

Figure S2. Example fit of fluid dynamic force (Eq.3, red points) to experimental data (room temperature, 4.4 Hz, blue points). A bulk viscosity of 40 mPa·s and slip length of 18 nm was used. The approach follows the procedure of Henry *et al.*<sup>1</sup> where the force is divided with viscosity and speed and plotted as a function of inverse separation. A straight line (passing through origin) represents a fluid dynamic force with no slip whereas a curved line (which is the case here) indicates slip.

## References

1. C. L. Henry and V. S. J. Craig, *Phys Chem Chem Phys*, 2009, **11**, 9514-9521.
